# Supplementary material for: Analysis of poly(ADP-ribose) polymerase-1 by enzyme-initiated auto-PARylation-controlled aggregation of hemin-graphene nanocomposites
Source: Royal Society of Chemistry journal article supplement (doi:10.1039/c8an00009c), 2018-01-01
Supplement: c8an00009c1.pdf [file c8an00009c1.pdf]

## **Analysis of poly(ADP-ribose) polymerase by enzyme-initiated auto-PARylation controlled aggregation of hemin-graphene nanocomposites**

Yong Liu<sup>a,#</sup>, Xiaolin Xu<sup>b,#</sup>, Haitang Yang<sup>a,b</sup>, Ensheng Xu<sup>b</sup>, Shuangshuang Wu<sup>b</sup>, Wei Wei<sup>b\*</sup>, Jin Chen<sup>c\*</sup>

*<sup>a</sup>College of Chemistry and Chemical Engineering, Henan University, Kaifeng, 475004, PR China*

*<sup>b</sup>Jiangsu Engineering Laboratory of Smart Carbon-Rich Materials and Device, Jiangsu Province Hi-Tech Key Laboratory for Bio-medical Research, School of Chemistry and Chemical Engineering, Southeast University, Nanjing, 211189, China*

*<sup>c</sup>School of Public Health, Key lab of Modern Toxicology of Ministry of Education, Nanjing Medical University, Nanjing 211166, China*

\*Corresponding author. Tel.: 86-25-52090613; Fax: 86-25-52090618.

*E-mail address: weiw@seu.edu.cn (W. Wei)*

*# Authors contributed equally to this work*

---

## Preparation of H-GNs

Graphene oxide (GO) was synthesized from natural graphite by Hummers' method with minor modification.<sup>23</sup> H-GNs then were prepared by using hydrazine as a reductant. In a typical process, hemin (20 mL, 0.5 mg/mL) was first dissolved in 0.1M NaOH solution, followed by addition of 20 mL as-prepared graphene oxide dispersion. After vigorously shaking for several minutes, 200  $\mu$ L ammonia solution and 30  $\mu$ L hydrazine in sequence were added to the solution. The mixture was stirred for 1 h and then was heated to 60°C for 24 h. Then, the dispersion rinsed with ultrapure water was centrifuged at 13000 rpm for 30 mins for several times to obtain H-GNs. The resulting H-GNs could be easily redispersed in water by ultrasonication.

## Characterization of H-GNs

To confirm successful composition of hemin on the graphene sheets, hemin-graphene nanosheets were characterized by UV-vis spectra (Figure S1A). GO exhibited a maximum absorption peak at 230 nm due to the  $\pi$ - $\pi^*$  transition of aromatic C=C bonds and a shoulder peak at 290-300 nm attributing to the n- $\pi^*$  transition of the C=O bond.<sup>24</sup> The absorption spectrum of free hemin showed a strong peak at 385 nm due to the Soret band, and a group of weak peaks between 500 nm and 700 nm attributed to the Q-bands.<sup>25</sup> After reaction between graphene with hemin, the maximum absorption at 230 nm was shifted to 265 nm in H-GNs, indicating the formation of rGO and the restoration of sp<sup>2</sup> structure in rGO. For the H-GNs, an absorption characteristic located at about 418 nm was observed, which should be the Soret band of hemin with a large bathochromic shift. This result revealed the existence of the  $\pi$ - $\pi$  interactions between rGO and hemin and confirmed that hemin molecules are attached to graphene.

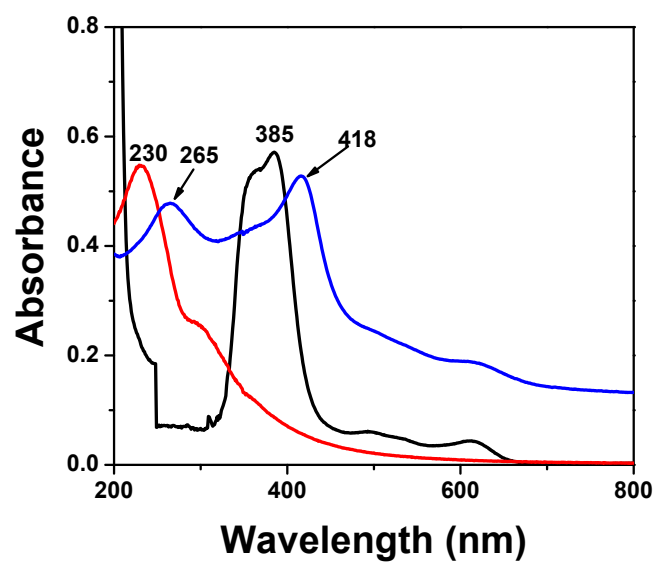

**Fig. S1** UV-vis spectra of GO suspension (red), hemin (blue), and H-GNs suspension (black).
